# Supplementary material
Source: publisher site journal article supplement (https://www.dovepress.com/article/353347)
Supplement: Supplementary file 1 [file get_supplementary_file.php]

**Appendix 1 – The search strings used in the scoping review**

The search strings for Scopus and Web of Science had to be adapted to each database to avoid generating millions of results. This demarcation was necessary since MS is primarily a medical subject and the term disability is used in the same way that impairment is used according to the social model of disability see for example 5,8,9.

The search string used in ASSIA, CINAHL, PsycInfo, Social Services Abstracts, Sociological Abstracts and Sociology Database

"multiple sclerosis" AND

disabilit* OR disabl* OR exclu* OR barrier* OR oppress* OR discrimin* OR access* OR disadvant* OR partici* OR restrict*

The search string used in Scopus

"multiple sclerosis" AND

((disabled OR disabilit*) W/3 (people* OR person*)) OR exclusion OR barrier* OR oppression OR discrimination OR access* OR disadvantage OR participation OR restriction

The search string used in Web of Science

"multiple sclerosis" AND

((disabled OR disabilit*) NEAR/3 (people* OR person*)) OR exclusion OR barrier* OR oppression OR discrimination OR access* OR disadvantage OR participation OR restriction
